# Supplementary material
Source: PubMed Central journal article supplement (PMC3325717)
Supplement: 1118472109_pnas.1118472109_SI.pdf [file 1118472109_pnas.1118472109_SI.pdf]

# Supporting Information

Ohmachi et al. 10.1073/pnas.1118472109

## SI Text

**Protein Preparation.** Myosin II and actin were obtained from rabbit skeletal muscle and purified as described previously (1). Filamentous actin was stained with TRITC-phalloidin (Sigma-Aldrich) at a molecular ratio of 1:1,000. For the myosin Va heavy chain construct, the human myosin Va heavy chain cDNA 3' end (1–3714 bp) was deleted to obtain a myosin Va cDNA fragment that encoded amino acids 1–1,238. This fragment included the motor domain, neck domain, and coiled-coil domain. To ensure specific binding to the Q rod, two HaloTags were added downstream and in frame with the C terminus of the myosin Va via an Arg-Ile-Ala-Thr peptide. Flag-tag was linked to the N terminus of the myosin Va HC-HaloTag peptide for purification by affinity chromatography.

**Motility Assay.** Flow cells were constructed by sandwiching parafilm (50  $\mu\text{m}$  thickness; Toray) with a quartz slide glass and cover glass (18 mm  $\times$  18 mm; Matsunami Glass).

**Actin Sliding Assay.** 10  $\mu\text{L}$  of 0.5 mg/mL  $\alpha$ -casein was introduced into the cell and incubated for 3 min. 5 mg/mL myosin II in motility buffer [MB; 25 mM KCl, 10 mM Hepes-KOH (pH 7.8), 5 mM  $\text{MgCl}_2$ , and 1 mM EDTA] was introduced into the cell, which was then incubated for 2 min and washed with 5 mg/mL  $\alpha$ -casein in MB. 1  $\mu\text{g}/\text{mL}$  sparsely labeled actin filaments in MB was flowed into the cell, incubated for 2 min and washed with 30  $\mu\text{L}$  MB. Finally, MB with an oxygen scavenger (1), 5  $\mu\text{M}$  ATP and an ATP-regeneration system was introduced into the cell. The specimen was sealed with enamel to prevent evaporation.

**Myosin V Motility Assay.** 10  $\mu\text{L}$  of 1.5 mg/mL  $\alpha$ -actinin was introduced into the cell and incubated for 3 min to allow for tight ad-

sorption. Unbound  $\alpha$ -actinin was removed by washing with 30  $\mu\text{L}$  MB. 10  $\mu\text{L}$  of 5  $\mu\text{g}/\text{mL}$  actin was added and incubated for 3 min to allow for tight adsorption. Excess actin was removed by washing with 30  $\mu\text{L}$  MB. The cell was then incubated with 10  $\mu\text{L}$  of 5 mg/mL  $\alpha$ -casein for 3 min to reduce particle adhesion. Excess  $\alpha$ -casein was removed by washing with 30  $\mu\text{L}$  MB. Finally, 5 nM Q rod conjugated myosin V in MB with an oxygen scavenger, 2  $\mu\text{M}$  ATP, and an ATP-regeneration system was added into the flow cell, which was sealed with enamel.

**Q Rod-Conjugated Myosin V Motility at 2  $\mu\text{M}$  ATP.** To see if the Q rod itself influences myosin motility, we observed Q rod-conjugated myosin V motility at 2  $\mu\text{M}$  ATP (Fig. S4). The average step size of Q rod-conjugated myosin V was  $36.5 \pm 7.8$  nm (mean  $\pm$  SD). The histogram of Q rod-conjugated myosin V dwell times was fitted to a double exponential curve, yielding rate constants of  $k_1 = 0.88 \pm 0.07$   $\mu\text{M}^{-1} \text{s}^{-1}$  and  $k_2 = 12.1 \pm 2.0$   $\text{s}^{-1}$ , which agree with the ATP-binding rate of 0.9  $\mu\text{M}^{-1} \text{s}^{-1}$  and ADP release rate of 12–16  $\text{s}^{-1}$  acquired from biochemical assays (2). The average translocation velocity was  $58.9 \pm 3.6$  nm/s (mean  $\pm$  SE). These results confirm the Q rod did not affect myosin V motility.

**Event Dwell Times.** Dwell time histograms were fitted to the following double exponential curve.

$$\rho(t) = A \left( \frac{k_1 k_2}{k_1 - k_2} \right) (\exp(-k_1 t) - \exp(-k_2 t)),$$

where  $t$  is dwell time and  $A$  is a constant. Dwell times were determined by eye.

1. Harada Y, Sakurada K, Aoki T, Thomas DD, Yanagida T (1990) Mechanochemical coupling in actomyosin energy transduction studied by in vitro movement assay. *J Mol Biol* 216:49–68.

2. De La Cruz EM, Wells AL, Rosenfeld SS, Ostap EM, Sweeney HL (1999) The kinetic mechanism of myosin V. *Proc Natl Acad Sci USA* 96:13726–13731.

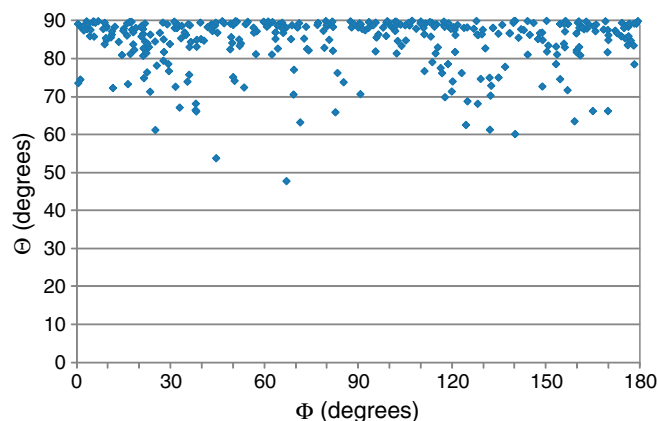

**Fig. S1.** Distribution of Q rods on a glass surface.  $\Theta$ , the tilt angle, mostly converges at  $90^\circ$ , while  $\Phi$ , the in-plane angle, distributes almost uniformly across all angles.
